# Supplementary material for: Selection in Europeans on Fatty Acid Desaturases Associated with Dietary Changes
Source: PubMed Central journal article supplement — Mol Biol Evol. 2017 Mar 16;34(6):1307–18. doi: 10.1093/molbev/msx103 (PMC5435082; doi:10.1093/molbev/msx103), 2017-03-16

## SUPPLEMENTARY MATERIALS

### Supplementary Information 1 – FADS haplotype analysis

We are able to replicate results from Mathieson (2015), which indicate there are two LD blocks in the FADS region (Supplementary fig. 1). “Block 1” (chr11:61547000-61625000) overlaps with *FADS1* entirely and with half of *FADS2*, while “block 2” (chr11:61627000-61673000) overlaps with the other half of *FADS2* and with *FADS3* entirely. These are mostly evident in when looking at Europeans (CEU+TSI panels), but Block 1 is also present when looking at East Asians (CHB+JPT). These patterns of LD are much weaker in Africans than in Eurasians, however.

The haplotype network plots reveal interesting relationship patterns between the different haplotypes (fig. 3). Even though the Altai Neanderthal and Denisova belong to sister populations, their closest respective haplotype clusters in the region are present-day human haplotypes. In block 1, these are different present-day haplotypes: the one closest to Altai Neanderthal is largely present in Africans, while the one closest to Denisova is largely present in Americans. In block 2, the closest haplotype to both archaic humans is a South Asian haplotype. These patterns do not appear to be consistent with a simple model of introgression, however. While the haplotype structure plots show distinct haplotypes coexisting in Eurasia (fig. 2), none of the present-day human haplotypes are particularly close to the archaic human haplotypes, relative to their distance to other present-day human haplotypes (fig. 3), as observed for other, more clear, cases of adaptive introgression (Huerta-Sánchez et al. 2014, Racimo et al. 2015).

We note that the haplotype networks we obtain are also quite distinct from those obtained in Mathieson (2015), in which the haplotypes from the two archaic genomes lie in between two present-day human haplotype clusters. It is unclear to us why this may be, but we are able to recover a more similar pattern to the one in the blog post when restricting our analysis to the 20kb region around rs174546 (as Mathieson does). We note, however, that the region Mathieson used does not cover the whole physical extent of LD block 1. When using this narrower region, we observe two distinct present-day haplotype clusters, with each of the archaic genomes clustering with one of the clusters (Supplementary fig. 3). However, in this case, the archaic genomes do not lie in the branch that connects the clusters. One possible reason for the discrepancy is the inclusion of Eskimo and Papuan sequences in the Mathieson (2015) blog post, which we did not include in this study. This network is more suggestive of the time-varying positive selection model described in Mathieson (2015), which would include at least three positive selection events and an archaic introgression event in Eurasia, but could also suggest ancestral structure or long-term balancing selection in the region.

### References

- 1000 Genomes Project Consortium. "A global reference for human genetic variation." *Nature* 526.7571 (2015): 68-74.
- Barrett, Jeffrey C., et al. "Haploview: analysis and visualization of LD and haplotype maps." *Bioinformatics* 21.2 (2005): 263-265.
- Meyer, Matthias, et al. "A high-coverage genome sequence from an archaic Denisovan individual." *Science* 338.6104 (2012): 222-226.
- Huerta-Sánchez, Emilia, et al. "Altitude adaptation in Tibetans caused by introgression of Denisovan-like DNA." *Nature* 512.7513 (2014): 194-197.
- International HapMap 3 Consortium. "Integrating common and rare genetic variation in diverse human populations." *Nature* 467.7311 (2010): 52-58.
- Mathieson, Iain. "FADS genes, selection and diet".  
<http://mathii.github.io/research/2015/12/14/fads1-selection-and-diet> (2015) [Accessed 03/22/2016]
- Paradis, Emmanuel. "pegas: an R package for population genetics with an integrated-modular approach." *Bioinformatics* 26.3 (2010): 419-420.
- Prüfer, Kay, et al. "The complete genome sequence of a Neanderthal from the Altai Mountains." *Nature* 505.7481 (2014): 43-49.
- Racimo, Fernando, et al. "Archaic adaptive introgression in *TBX15/WARS2*." *bioRxiv* (2015): 033928.

## Supplementary Information 2 - Inference of targets of selection

The present-day sequences were computationally phased using large panels by the 1000 Genomes consortium (Genomes Project, et al. 2015) and likely have quite reliable phasing. However, the low coverage ancient DNA data are more difficult to phase. In particular, the use of present-day reference panels may bias haplotype inferences to look more similar to the ones observed in present-day data, thereby introducing a potential source of bias. We instead used a likelihood model to compare present-day phased haplotypes to unphased two-locus genotypes from the ancient data. A summary of the data used in these analyses is given in Suppl. tables 1 and 2.

We implemented a likelihood model expressing the sampling probabilities of the ancient DNA two-locus genotype frequencies as functions of the present-day haplotype frequencies and a parameter modeling change in allele frequency. We compared three models:

**Model 1:** Selection acts to change the allele frequencies in rs174546 and the change of allele frequency in rs174594 is a secondary effect driven by linkage with rs174546.

**Model 2:** Selection acts to change the allele frequencies in rs174594 and the change of allele frequency in rs174546 is a secondary effect driven by linkage with rs174594.

**Model 3:** Selection acts on the haplotype that carries the derived allele for both rs174546 and rs174594 (DD).

The statistical model we use then first calculates the expected haplotype frequencies in the Bronze age data given the present-day haplotype frequencies and a certain change in allele frequency  $q$ . Let  $f_{AA}, f_{DA}, f_{AD}$ , and  $f_{DD}$  denote, respectively, the frequencies of ancestral/ancestral, derived/ancestral, ancestral/ derived, and derived/derived genotypes in the present-day data for SNPs rs174546/rs174594. Then for Model 1, given an increase in the derived allele frequency in rs174546 of  $q$ , the expected allele frequencies in the Bronze age data are

$$\begin{aligned} f_{AA}(q) &= -q f_{AA}/(f_{AA} + f_{AD}) + f_{AA}, \\ f_{AD}(q) &= -q f_{AD}/(f_{AA} + f_{AD}) + f_{AD}, \\ f_{DA}(q) &= q f_{DA}/(f_{DA} + f_{DD}) + f_{DA}, \\ f_{DD}(q) &= q f_{DD}/(f_{DA} + f_{DD}) + f_{DD}. \end{aligned}$$

for  $f_{AA} + f_{AD} - 1 \leq q \leq f_{AA} + f_{AD}$ . The Bronze Age two-locus genotype probabilities can then be calculated using standard calculations, for example the frequency of genotype (AD, AD) is  $2 f_{AA}(q) f_{DD}(q) + 2 f_{DA}(q) f_{AD}(q)$ .

The two-locus genotype probabilities can be calculated equivalently for model 2. For model 3 the haplotype probabilities are calculated as

$$\begin{aligned} f_{AA}(q) &= q f_{AA}/(1 - f_{DD}) + f_{AA}, \\ f_{DA}(q) &= q f_{AD}/(1 - f_{DD}) + f_{AD}, \\ f_{AD}(q) &= q f_{DA}/(1 - f_{DD}) + f_{DA}, \\ f_{DD}(q) &= -q + f_{DD}. \end{aligned}$$

for  $f_{DD} - 1 \leq q \leq f_{DD}$ . The two-locus genotype probabilities are then computed from the expected haplotype probabilities using the same method as for Models 1 and 2. For each model we form a likelihood function by assuming multinomial sampling of genotypes. Notice that this approach ignores sampling variance among the present-day haplotype frequencies. We assume that the sample sizes are sufficiently large that this variance can be ignored. The likelihood values of the three different values are given below:

**SI2 Table 1**

| Model   | Maximum log likelihood value | Maximum likelihood estimate of $q$ |
|---------|------------------------------|------------------------------------|
| Model 1 | -211.13                      | 0.17                               |
| Model 2 | -199.54                      | 0.23                               |
| Model 3 | -200.00                      | 0.22                               |

Notice that there is most support for Model 2 and 3. With a difference in log likelihood of 10, standard model selection criteria such as the Akaike Information Criterion would select models 2 and 3. But with a difference in log likelihood between Model 2 and 3, there is not sufficient evidence in the data to rule out Model 3 in favor of Model 2.

We also repeated the analysis using SNPs rs174594 and rs174455 to determine which of these SNPs selection most likely has acted on. In this case, the hypotheses investigated are:

**Model 1:** Selection acts to change the allele frequencies in rs174455 and the change of allele frequency in rs174594 is a secondary effect driven by linkage with rs174455.

**Model 2:** Selection acts to change the allele frequencies in rs174594 and the change of allele frequency in rs174455 is a secondary effect driven by linkage with rs174594.

**Model 3:** Selection acts on the haplotype that carries the derived allele for both rs174455 and rs174594 (DD).

The likelihood values of the three different values are given below:

**SI2 Table 2**

| <b>Model</b>   | <b>Maximum log likelihood value</b> | <b>Maximum likelihood estimate of <math>q</math></b> |
|----------------|-------------------------------------|------------------------------------------------------|
| <b>Model 1</b> | -233.86                             | 0.18                                                 |
| <b>Model 2</b> | -221.30                             | 0.24                                                 |
| <b>Model 3</b> | -228.04                             | 0.21                                                 |

In this case, there is strong support for Model 2, i.e. the most likely scenario is selection acting on rs174594 with changes in rs174455 being induced by linkage disequilibrium.



## Block 1

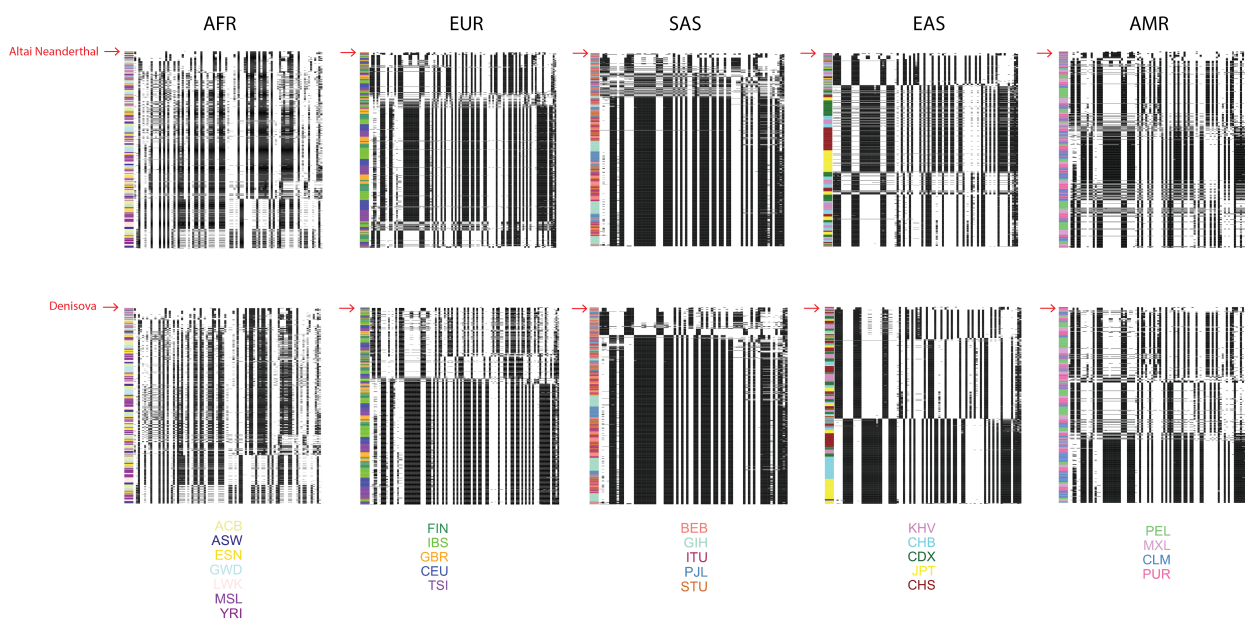

## Block 2

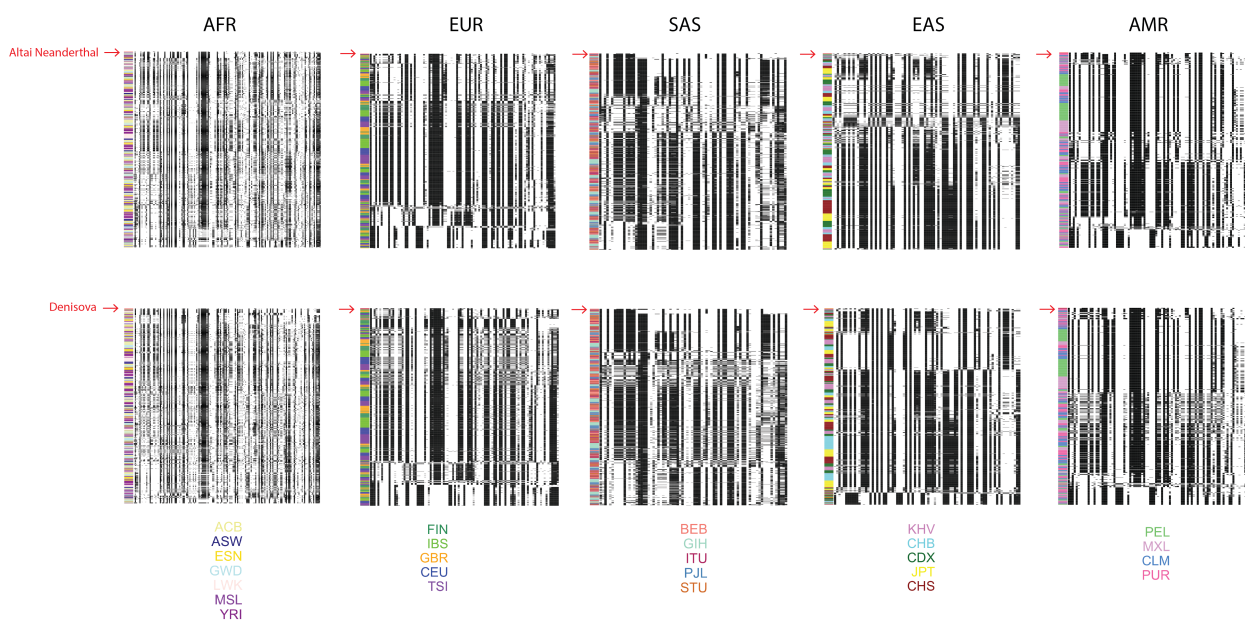

**Supplementary fig. 2.** Haplotype structure plots of the two LD blocks in the *FADS* region, ordered by decreasing similarity to either the Altai Neanderthal or the Denisova genomes, for each 1000 Genomes continental panel. The SNPs within each plot were filtered for a minor allele frequency > 5%. Black squared represent derived alleles, while white squared represent ancestral alleles.

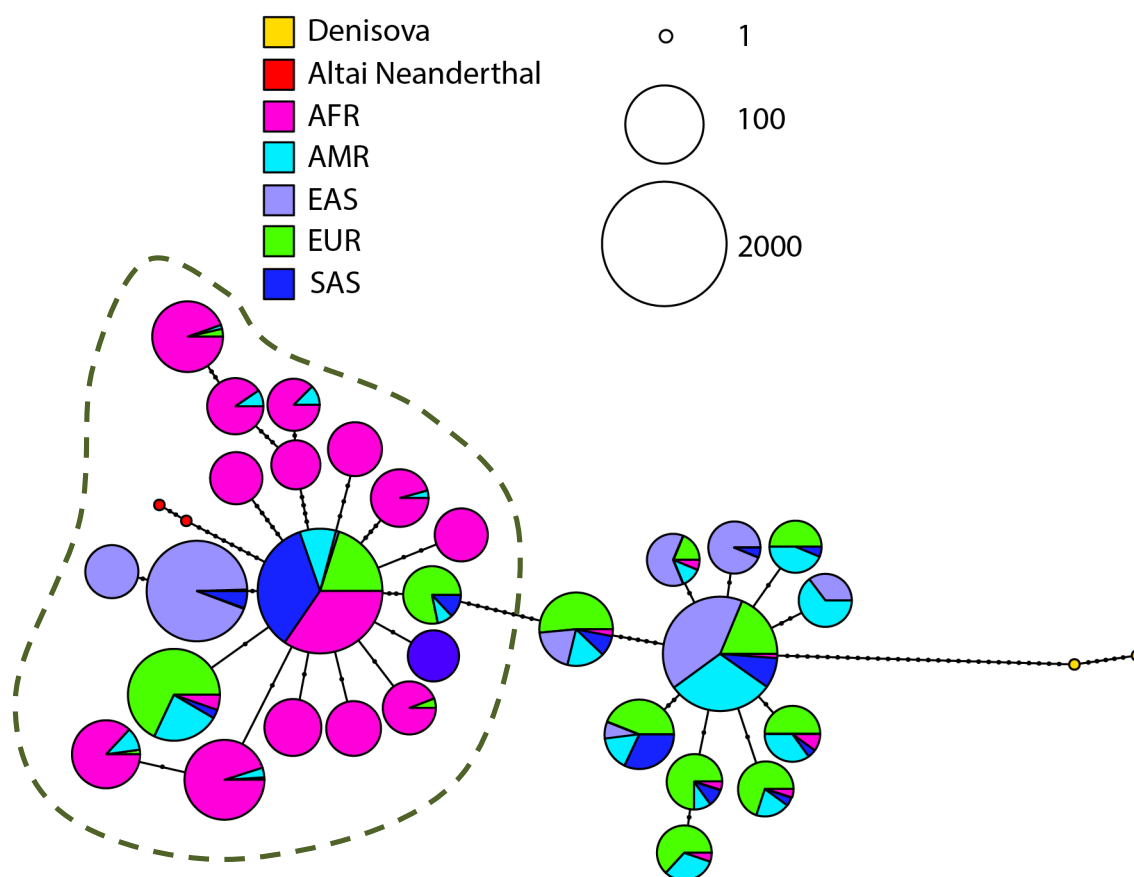

**Supplementary fig. 3.** Haplotype network plots of the 20kb region around rs174546 (Mathieson 2015), using the phase 3 1000 Genomes data, built using pegas (Paradis et al. 2010). The colors denote the continental populations to which each haplotype belongs. The size of the pie charts is proportional to  $\log_2(n)$  where  $n$  is the number of individuals carrying the haplotype. The black dots on each connecting line denote the number of differences separating each haplotype from its neighbors. The dotted line denotes the haplotype cluster in which the derived allele from rs174546 (from Mathieson's blog post) is located.

**Supplementary table 1.** LD between selected SNPs by 1000 Genomes Population

|                                             |
|---------------------------------------------|
| Variant Color Key                           |
| Lead SNP in Mathieson (2015) / Aneur (2012) |
| HDS from this study                         |
| Selected SNP in Inuit (Fumagalli 2015)      |
| Lead SNP in Mathias et al (2012)            |
| Indel from Kothapalli et al (2016)          |

**A.**

| R <sup>2</sup> for rs373263659 | Population |       |       |       |       |       |       |        |
|--------------------------------|------------|-------|-------|-------|-------|-------|-------|--------|
| Pairwise Variant               | CEU        | FIN   | GBR   | TSI   | IBS   | BEB   | ITU   | YRI    |
| rs174546                       | 0.271      | 0.373 | 0.229 | 0.082 | 0.161 | 0.767 | 0.661 | 0.049  |
| rs174594                       | 0.197      | 0.324 | 0.172 | 0.087 | 0.121 | 0.681 | 0.243 | 0.001  |
| rs97384                        | 0.215      | 0.328 | 0.154 | 0.065 | 0.105 | 0.522 | 0.188 | 0.049  |
| rs174455                       | 0.117      | 0.190 | 0.031 | 0.041 | 0.060 | 0.005 | 0.018 | 0.002  |
| rs174465                       | 0.100      | 0.142 | 0.042 | 0.036 | 0.089 | 0.000 | 0.016 | 0.1314 |
| rs174570                       | 0.075      | 0.170 | 0.118 | 0.009 | 0.041 | 0.353 | 0.215 | 0.024  |
| rs174537                       | 0.259      | 0.373 | 0.229 | 0.088 | 0.161 | 0.739 | 0.473 | 0.024  |

**B.**

| R <sup>2</sup> for rs174537 | Population |       |       |       |       |       |       |       |
|-----------------------------|------------|-------|-------|-------|-------|-------|-------|-------|
| Pairwise Variant            | CEU        | FIN   | GBR   | TSI   | IBS   | BEB   | ITU   | YRI   |
| rs174546                    | 0.978      | 1.000 | 1.000 | 0.975 | 1.000 | 0.897 | 0.646 | 1.000 |
| rs174594                    | 0.837      | 0.904 | 0.872 | 0.686 | 0.773 | 0.681 | 0.228 | 0.000 |
| rs97384                     | 0.762      | 0.864 | 0.830 | 0.648 | 0.706 | 0.522 | 0.210 | 0.001 |
| rs174455                    | 0.291      | 0.365 | 0.392 | 0.412 | 0.303 | 0.017 | 0.043 | 0.000 |
| rs174465                    | 0.245      | 0.205 | 0.347 | 0.272 | 0.275 | 0.006 | 0.032 | 0.052 |
| rs174570                    | 0.337      | 0.389 | 0.368 | 0.306 | 0.317 | 0.464 | 0.290 | 1.000 |
| rs373263659                 | 0.259      | 0.373 | 0.229 | 0.088 | 0.161 | 0.739 | 0.473 | 0.024 |

**C.**

| R <sup>2</sup> for rs174570 | Population |       |       |       |       |       |       |       |
|-----------------------------|------------|-------|-------|-------|-------|-------|-------|-------|
| Pairwise Variant            | CEU        | FIN   | GBR   | TSI   | IBS   | BEB   | ITU   | YRI   |
| rs174546                    | 0.345      | 0.389 | 0.368 | 0.313 | 0.317 | 0.544 | 0.449 | 1.000 |
| rs174594                    | 0.309      | 0.352 | 0.320 | 0.221 | 0.245 | 0.366 | 0.156 | 0.000 |
| rs97384                     | 0.297      | 0.339 | 0.320 | 0.221 | 0.235 | 0.288 | 0.145 | 0.000 |
| rs174455                    | 0.077      | 0.223 | 0.174 | 0.150 | 0.085 | 0.005 | 0.000 | 0.000 |
| rs174465                    | 0.038      | 0.037 | 0.084 | 0.032 | 0.021 | 0.003 | 0.003 | 0.052 |
| rs174537                    | 0.337      | 0.389 | 0.368 | 0.306 | 0.317 | 0.464 | 0.290 | 1.000 |
| rs373263659                 | 0.075      | 0.170 | 0.118 | 0.009 | 0.041 | 0.353 | 0.215 | 0.024 |



**D.**

| R <sup>2</sup> for rs174546 | Population |       |       |       |       |       |       |       |
|-----------------------------|------------|-------|-------|-------|-------|-------|-------|-------|
| Pairwise Variant            | CEU        | FIN   | GBR   | TSI   | IBS   | BEB   | ITU   | YRI   |
| rs174594                    | 0.857      | 0.904 | 0.872 | 0.668 | 0.773 | 0.709 | 0.406 | 0.000 |
| rs97384                     | 0.782      | 0.864 | 0.830 | 0.631 | 0.706 | 0.546 | 0.329 | 0.001 |
| rs174455                    | 0.277      | 0.365 | 0.392 | 0.397 | 0.303 | 0.007 | 0.008 | 0.000 |
| rs174465                    | 0.230      | 0.205 | 0.347 | 0.258 | 0.275 | 0.001 | 0.006 | 0.052 |
| rs174537                    | 0.978      | 1.000 | 1.000 | 0.975 | 1.000 | 0.897 | 0.646 | 1.000 |
| rs373263659                 | 0.271      | 0.373 | 0.229 | 0.082 | 0.161 | 0.767 | 0.661 | 0.049 |
| rs174570                    | 0.345      | 0.389 | 0.368 | 0.313 | 0.317 | 0.544 | 0.449 | 1.000 |

**E.**

| R <sup>2</sup> for rs174594 | Population |       |       |       |       |       |       |       |
|-----------------------------|------------|-------|-------|-------|-------|-------|-------|-------|
| Pairwise Variant            | CEU        | FIN   | GBR   | TSI   | IBS   | BEB   | ITU   | YRI   |
| rs174546                    | 0.857      | 0.904 | 0.872 | 0.668 | 0.773 | 0.709 | 0.406 | 0.000 |
| rs97384                     | 0.917      | 0.921 | 0.912 | 0.915 | 0.920 | 0.747 | 0.759 | 0.127 |
| rs174455                    | 0.373      | 0.438 | 0.484 | 0.508 | 0.420 | 0.015 | 0.015 | 0.545 |
| rs174465                    | 0.258      | 0.234 | 0.362 | 0.327 | 0.342 | 0.006 | 0.006 | 0.055 |
| rs174537                    | 0.837      | 0.904 | 0.872 | 0.686 | 0.773 | 0.681 | 0.228 | 0.000 |
| rs373263659                 | 0.197      | 0.324 | 0.172 | 0.087 | 0.121 | 0.681 | 0.243 | 0.001 |
| rs174570                    | 0.309      | 0.352 | 0.320 | 0.221 | 0.245 | 0.366 | 0.156 | 0.000 |

**F.**

| R <sup>2</sup> for rs174455 | Population |       |       |       |       |       |       |       |
|-----------------------------|------------|-------|-------|-------|-------|-------|-------|-------|
| Pairwise Variant            | CEU        | FIN   | GBR   | TSI   | IBS   | BEB   | ITU   | YRI   |
| rs174546                    | 0.277      | 0.365 | 0.392 | 0.397 | 0.303 | 0.007 | 0.008 | 0.000 |
| rs174594                    | 0.373      | 0.438 | 0.484 | 0.508 | 0.420 | 0.015 | 0.015 | 0.545 |
| rs97384                     | 0.405      | 0.435 | 0.484 | 0.508 | 0.446 | 0.001 | 0.022 | 0.261 |
| rs174465                    | 0.776      | 0.617 | 0.758 | 0.762 | 0.725 | 0.887 | 0.871 | 0.131 |
| rs174537                    | 0.291      | 0.365 | 0.392 | 0.412 | 0.303 | 0.017 | 0.043 | 0.000 |
| rs373263659                 | 0.117      | 0.190 | 0.031 | 0.041 | 0.060 | 0.005 | 0.018 | 0.002 |
| rs174570                    | 0.077      | 0.223 | 0.174 | 0.150 | 0.085 | 0.005 | 0.000 | 0.000 |

**Supplementary table 2.** Allelic heterogeneity results from CAVIAR analysis.

| Gene  | Tissue                              | Pr(no causal) | Pr(1 causal) | Pr(2 causal) | Pr(3 causal) | Pr(4 causal) | Pr(5 causal) | Pr(6 casual) |
|-------|-------------------------------------|---------------|--------------|--------------|--------------|--------------|--------------|--------------|
| FADS1 | Artery_Tibial                       | 2.33E-03      | 1.84E-01     | 6.51E-01     | 1.53E-01     | 9.26E-03     | 1.97E-04     | 2.54E-06     |
| FADS1 | Brain_Cerebellar_Hemisphere         | 1.06E-04      | 8.25E-01     | 1.70E-01     | 4.35E-03     | 5.62E-05     | 4.91E-07     | 3.26E-09     |
| FADS1 | Brain_Cerebellum                    | 4.86E-11      | 7.88E-01     | 2.05E-01     | 7.15E-03     | 1.15E-04     | 1.20E-06     | 9.21E-09     |
| FADS1 | Brain_Hippocampus                   | 4.81E-02      | 9.10E-01     | 4.12E-02     | 6.76E-04     | 7.02E-06     | 5.38E-08     | 3.28E-10     |
| FADS1 | Brain_Putamen_basal_ganglia         | 1.53E-02      | 9.22E-01     | 6.11E-02     | 1.13E-03     | 1.24E-05     | 9.85E-08     | 6.12E-10     |
| FADS1 | Esophagus_Mucosa                    | 2.12E-06      | 8.76E-01     | 1.21E-01     | 3.13E-03     | 4.17E-05     | 3.76E-07     | 2.57E-09     |
| FADS1 | Heart_Left_Ventricle                | 2.41E-02      | 9.21E-01     | 5.40E-02     | 1.02E-03     | 1.10E-05     | 8.45E-08     | 5.02E-10     |
| FADS1 | Muscle_Skeletal                     | 4.29E-05      | 8.66E-01     | 1.31E-01     | 3.39E-03     | 4.61E-05     | 4.29E-07     | 3.04E-09     |
| FADS1 | Nerve_Tibial                        | 3.34E-07      | 8.77E-01     | 1.20E-01     | 3.24E-03     | 4.68E-05     | 4.64E-07     | 3.50E-09     |
| FADS1 | Pancreas                            | 5.23E-17      | 6.91E-01     | 2.97E-01     | 1.24E-02     | 2.71E-04     | 4.21E-06     | 5.01E-08     |
| FADS1 | Stomach                             | 1.64E-05      | 9.20E-01     | 7.80E-02     | 1.83E-03     | 2.50E-05     | 2.40E-07     | 1.77E-09     |
| FADS1 | Testis                              | 2.18E-02      | 9.27E-01     | 5.04E-02     | 9.04E-04     | 9.58E-06     | 7.29E-08     | 4.34E-10     |
| FADS1 | Thyroid                             | 1.29E-02      | 9.05E-01     | 8.03E-02     | 2.22E-03     | 3.05E-05     | 2.81E-07     | 1.96E-09     |
| FADS2 | Adipose_Subcutaneous                | 6.67E-03      | 8.29E-01     | 1.53E-01     | 1.12E-02     | 4.29E-04     | 9.35E-06     | 1.31E-07     |
| FADS2 | Adipose_Visceral_Omentum            | 2.72E-02      | 7.20E-01     | 2.33E-01     | 1.93E-02     | 5.05E-04     | 7.37E-06     | 7.71E-08     |
| FADS2 | Artery_Aorta                        | 1.02E-05      | 7.89E-01     | 2.05E-01     | 5.94E-03     | 8.14E-05     | 7.34E-07     | 4.97E-09     |
| FADS2 | Artery_Tibial                       | 1.50E-03      | 8.67E-01     | 1.28E-01     | 3.02E-03     | 3.62E-05     | 2.94E-07     | 1.81E-09     |
| FADS2 | Breast_Mammary_Tissue               | 2.45E-04      | 5.22E-01     | 4.33E-01     | 4.35E-02     | 1.27E-03     | 1.96E-05     | 2.03E-07     |
| FADS2 | Cells_Transformed_fibroblasts       | 1.18E-27      | 2.31E-01     | 7.25E-01     | 4.36E-02     | 9.15E-04     | 1.20E-05     | 1.13E-07     |
| FADS2 | Colon_Sigmoid                       | 1.11E-04      | 6.84E-01     | 3.03E-01     | 1.24E-02     | 2.02E-04     | 2.01E-06     | 1.43E-08     |
| FADS2 | Colon_Transverse                    | 1.62E-15      | 6.36E-01     | 3.49E-01     | 1.40E-02     | 2.46E-04     | 2.85E-06     | 2.45E-08     |
| FADS2 | Esophagus_Gastroesophageal_Junction | 1.14E-05      | 9.52E-01     | 4.68E-02     | 8.50E-04     | 9.83E-06     | 8.41E-08     | 5.69E-10     |
| FADS2 | Esophagus_Mucosa                    | 1.52E-04      | 5.25E-01     | 4.47E-01     | 2.74E-02     | 5.95E-04     | 7.68E-06     | 7.06E-08     |
| FADS2 | Esophagus_Muscularis                | 3.24E-19      | 5.68E-01     | 4.08E-01     | 2.32E-02     | 4.85E-04     | 6.49E-06     | 6.41E-08     |
| FADS2 | Heart_Atrial_Appendage              | 1.85E-04      | 8.91E-01     | 1.07E-01     | 2.50E-03     | 3.09E-05     | 2.63E-07     | 1.71E-09     |
| FADS2 | Heart_Left_Ventricle                | 1.12E-09      | 2.21E-01     | 7.39E-01     | 3.98E-02     | 7.46E-04     | 8.16E-06     | 6.30E-08     |
| FADS2 | Lung                                | 1.99E-03      | 8.86E-01     | 1.09E-01     | 2.68E-03     | 3.34E-05     | 2.82E-07     | 1.81E-09     |
| FADS2 | Muscle_Skeletal                     | 6.71E-05      | 7.31E-01     | 2.60E-01     | 8.56E-03     | 1.23E-04     | 1.13E-06     | 7.60E-09     |
| FADS2 | Nerve_Tibial                        | 4.22E-10      | 8.24E-01     | 1.70E-01     | 5.39E-03     | 8.43E-05     | 8.81E-07     | 6.90E-09     |

|       |                                     |           |          |          |          |          |          |          |
|-------|-------------------------------------|-----------|----------|----------|----------|----------|----------|----------|
| FADS2 | Pancreas                            | 2.10E-02  | 8.57E-01 | 1.16E-01 | 6.38E-03 | 2.16E-04 | 4.66E-06 | 6.80E-08 |
| FADS2 | Small_Intestine_Terminal_Ileum      | 1.00E-15  | 9.25E-01 | 7.33E-02 | 2.06E-03 | 3.73E-05 | 4.84E-07 | 4.79E-09 |
| FADS2 | Spleen                              | 2.58E-17  | 8.16E-01 | 1.78E-01 | 5.11E-03 | 8.45E-05 | 9.86E-07 | 8.86E-09 |
| FADS2 | Stomach                             | 5.21E-03  | 5.80E-01 | 3.67E-01 | 4.57E-02 | 2.17E-03 | 4.84E-05 | 6.23E-07 |
| FADS2 | Testis                              | 4.94E-02  | 7.37E-01 | 2.00E-01 | 1.41E-02 | 3.55E-04 | 4.78E-06 | 4.30E-08 |
| FADS2 | Thyroid                             | 2.29E-15  | 4.11E-01 | 5.65E-01 | 2.40E-02 | 4.29E-04 | 4.89E-06 | 4.09E-08 |
| FADS2 | Whole_Blood                         | 2.94E-102 | 7.51E-09 | 1.79E-01 | 7.43E-01 | 7.39E-02 | 3.79E-03 | 8.43E-05 |
| FADS3 | Brain_Cerebellar_Hemisphere         | 1.72E-02  | 8.50E-01 | 1.30E-01 | 3.36E-03 | 4.31E-05 | 3.67E-07 | 2.35E-09 |
| FADS3 | Brain_Cerebellum                    | 8.00E-03  | 9.43E-01 | 4.85E-02 | 9.17E-04 | 1.08E-05 | 9.33E-08 | 6.31E-10 |
| FADS3 | Esophagus_Gastroesophageal_Junction | 1.53E-01  | 7.11E-01 | 1.31E-01 | 4.18E-03 | 6.61E-05 | 6.84E-07 | 5.25E-09 |
| FADS3 | Liver                               | 2.07E-02  | 8.88E-01 | 8.86E-02 | 2.54E-03 | 3.59E-05 | 3.35E-07 | 2.34E-09 |
| FADS3 | Nerve_Tibial                        | 1.23E-02  | 3.18E-01 | 5.08E-01 | 1.50E-01 | 1.15E-02 | 3.90E-04 | 7.41E-06 |

**Supplementary table 2A.** Complete GTEx eQTL results for 4 HDSs and rs174546, ordered by p-value.

| Gene Symbol | SNP ID   | P-Value  | Effect Size | Tissue                          |
|-------------|----------|----------|-------------|---------------------------------|
| FADS2       | rs174546 | 4.00E-29 | -0.77       | Whole Blood                     |
| FADS2       | rs174594 | 2.90E-21 | -0.63       | Whole Blood                     |
| FADS2       | rs97384  | 9.30E-20 | -0.62       | Whole Blood                     |
| FADS1       | rs174546 | 1.40E-15 | 0.73        | Pancreas                        |
| FADS2       | rs174546 | 5.80E-13 | -0.26       | Cells - Transformed fibroblasts |
| FADS1       | rs174546 | 2.30E-12 | 0.72        | Brain - Cerebellum              |
| FADS2       | rs174546 | 8.80E-12 | -0.42       | Thyroid                         |
| FADS2       | rs174465 | 3.80E-11 | -0.46       | Whole Blood                     |
| FADS2       | rs174546 | 3.90E-11 | -0.5        | Esophagus - Muscularis          |
| FADS2       | rs174455 | 6.20E-11 | -0.45       | Whole Blood                     |
| FADS2       | rs174594 | 9.40E-11 | -0.46       | Esophagus - Muscularis          |
| FADS2       | rs174546 | 1.00E-10 | -0.37       | Colon - Transverse              |
| FADS1       | rs174594 | 1.10E-10 | 0.6         | Pancreas                        |
| FADS2       | rs97384  | 3.10E-10 | -0.46       | Esophagus - Muscularis          |
| FADS1       | rs174546 | 4.60E-10 | 0.41        | Esophagus - Mucosa              |
| FADS2       | rs174594 | 5.50E-10 | -0.21       | Cells - Transformed fibroblasts |
| FADS1       | rs97384  | 5.90E-10 | 0.6         | Pancreas                        |
| FADS2       | rs174546 | 1.20E-09 | -1          | Spleen                          |
| FADS1       | rs174546 | 1.20E-09 | 0.37        | Nerve - Tibial                  |
| FADS2       | rs174546 | 9.20E-09 | -0.38       | Heart - Left Ventricle          |
| FADS2       | rs97384  | 1.00E-08 | -0.2        | Cells - Transformed fibroblasts |
| FADS1       | rs97384  | 1.10E-08 | 0.58        | Brain - Cerebellum              |
| FADS1       | rs174594 | 1.20E-08 | 0.58        | Brain - Cerebellum              |
| FADS2       | rs174455 | 1.50E-08 | -0.42       | Esophagus - Muscularis          |
| FADS2       | rs174546 | 1.60E-08 | -0.27       | Muscle - Skeletal               |
| FADS2       | rs174594 | 1.90E-08 | -0.37       | Heart - Left Ventricle          |
| FADS2       | rs97384  | 2.50E-08 | -0.32       | Colon - Transverse              |
| FADS1       | rs174594 | 2.70E-08 | 0.58        | Brain - Cerebellar Hemisphere   |
| FADS1       | rs97384  | 3.10E-08 | 0.2         | Muscle - Skeletal               |
| FADS2       | rs174546 | 4.00E-08 | -0.37       | Nerve - Tibial                  |
| FADS2       | rs174594 | 5.40E-08 | -0.32       | Thyroid                         |
| FADS1       | rs174594 | 5.70E-08 | 0.19        | Muscle - Skeletal               |

|         |          |           |       |                                 |
|---------|----------|-----------|-------|---------------------------------|
| FADS2   | rs174594 | 6.30E-08  | -0.3  | Colon - Transverse              |
| FADS1   | rs174546 | 7.60E-08  | 0.21  | Muscle - Skeletal               |
| FADS1   | rs97384  | 1.00E-07  | 0.57  | Brain - Cerebellar Hemisphere   |
| FADS2   | rs97384  | 1.60E-07  | -0.31 | Thyroid                         |
| FADS2   | rs97384  | 1.80E-07  | -0.35 | Heart - Left Ventricle          |
| FADS2   | rs174594 | 3.30E-07  | -0.33 | Nerve - Tibial                  |
| FADS1   | rs174546 | 3.40E-07  | 0.57  | Brain - Cerebellar Hemisphere   |
| FADS1   | rs174594 | 4.00E-07  | 0.32  | Esophagus - Mucosa              |
| FADS2   | rs174546 | 4.40E-07  | -0.36 | Artery - Aorta                  |
| FADS2   | rs174546 | 4.50E-07  | -0.25 | Artery - Tibial                 |
| FADS2   | rs174465 | 4.70E-07  | -0.38 | Esophagus - Muscularis          |
| TMEM258 | rs174546 | 5.20E-07  | -0.2  | Skin - Sun Exposed (Lower leg)  |
| FADS1   | rs174594 | 6.60E-07  | 0.29  | Nerve - Tibial                  |
| FADS2   | rs97384  | 7.30E-07  | -0.33 | Nerve - Tibial                  |
| FADS2   | rs97384  | 9.40E-07  | -0.5  | Colon - Sigmoid                 |
| FADS2   | rs174594 | 0.000001  | -0.32 | Artery - Aorta                  |
| FADS1   | rs174546 | 0.0000013 | 0.33  | Stomach                         |
| FADS1   | rs174465 | 0.0000013 | 0.46  | Pancreas                        |
| TMEM258 | rs174546 | 0.0000017 | -0.17 | Artery - Tibial                 |
| FADS2   | rs174594 | 0.000002  | -0.79 | Spleen                          |
| TMEM258 | rs174546 | 0.0000042 | -0.17 | Cells - Transformed fibroblasts |
| FADS2   | rs174465 | 0.0000045 | -0.28 | Thyroid                         |
| FADS1   | rs97384  | 0.0000058 | 0.21  | Artery - Tibial                 |
| FADS2   | rs174546 | 0.0000063 | -0.25 | Lung                            |
| FADS1   | rs174465 | 0.0000063 | 0.28  | Nerve - Tibial                  |
| FADS2   | rs174546 | 0.000007  | -0.33 | Heart - Atrial Appendage        |
| FADS2   | rs97384  | 0.000007  | -0.3  | Artery - Aorta                  |
| FADS2   | rs174455 | 0.000007  | -0.27 | Thyroid                         |
| FADS2   | rs174594 | 0.0000076 | -0.2  | Muscle - Skeletal               |
| TMEM258 | rs174594 | 0.000008  | -0.15 | Artery - Tibial                 |
| TMEM258 | rs97384  | 0.0000084 | -0.17 | Skin - Sun Exposed (Lower leg)  |
| TMEM258 | rs174594 | 0.0000089 | -0.15 | Whole Blood                     |
| FADS1   | rs97384  | 0.00001   | 0.3   | Esophagus - Mucosa              |
| FADS1   | rs174546 | 0.000013  | 0.24  | Thyroid                         |
| FADS1   | rs174455 | 0.000013  | 0.16  | Muscle - Skeletal               |
| FADS1   | rs97384  | 0.000021  | 0.26  | Nerve - Tibial                  |

**Supplementary table 2B.** Complete list of GTEx tissue types.

| Tissue                                    | Number of Samples |
|-------------------------------------------|-------------------|
| Muscle - Skeletal                         | 361               |
| Whole Blood                               | 338               |
| Skin - Sun Exposed (Lower leg)            | 302               |
| Adipose - Subcutaneous                    | 298               |
| Artery - Tibial                           | 285               |
| Thyroid                                   | 278               |
| Lung                                      | 278               |
| Nerve - Tibial                            | 256               |
| Esophagus - Mucosa                        | 241               |
| Cells - Transformed fibroblasts           | 272               |
| Skin - Not Sun Exposed (Suprapubic)       | 196               |
| Esophagus - Muscularis                    | 218               |
| Adipose - Visceral (Omentum)              | 185               |
| Artery - Aorta                            | 197               |
| Heart - Left Ventricle                    | 190               |
| Breast - Mammary Tissue                   | 183               |
| Colon - Transverse                        | 169               |
| Heart - Atrial Appendage                  | 159               |
| Stomach                                   | 170               |
| Testis                                    | 157               |
| Pancreas                                  | 149               |
| Esophagus - Gastroesophageal Junction     | 127               |
| Colon - Sigmoid                           | 124               |
| Adrenal Gland                             | 126               |
| Artery - Coronary                         | 118               |
| Brain - Cerebellum                        | 103               |
| Liver                                     | 97                |
| Cells - EBV-transformed lymphocytes       | 114               |
| Brain - Caudate (basal ganglia)           | 100               |
| Brain - Cortex                            | 96                |
| Brain - Nucleus accumbens (basal ganglia) | 93                |
| Brain - Frontal Cortex (BA9)              | 92                |

|                                          |    |
|------------------------------------------|----|
| Prostate                                 | 87 |
| Brain - Cerebellar Hemisphere            | 89 |
| Spleen                                   | 89 |
| Pituitary                                | 87 |
| Brain - Putamen (basal ganglia)          | 82 |
| Ovary                                    | 85 |
| Brain - Hypothalamus                     | 81 |
| Vagina                                   | 79 |
| Brain - Hippocampus                      | 81 |
| Small Intestine - Terminal Ileum         | 77 |
| Brain - Anterior cingulate cortex (BA24) | 72 |
| Uterus                                   | 70 |
| Brain - Amygdala                         | 62 |
| Brain - Spinal cord (cervical c-1)       | 59 |
| Brain - Substantia nigra                 | 56 |
| Minor Salivary Gland                     | 51 |
| Kidney - Cortex                          | 26 |
| Bladder                                  | 11 |
| Cervix - Ectocervix                      | 6  |
| Fallopian Tube                           | 6  |
| Cervix - Endocervix                      | 5  |

**Supplementary table 3.** Functional Characterization of HDSs

| <b>SNP</b> | <b>Ref.</b> | <b>Anc.</b> | <b>CADD Score (Raw)</b> | <b>GERP Score</b> | <b>SEGWAY</b>                       | <b>WashU Epigenomics Browser</b>                                                                              |
|------------|-------------|-------------|-------------------------|-------------------|-------------------------------------|---------------------------------------------------------------------------------------------------------------|
| rs174546   | C           | T           | 1.259214                | 4.54              | GS (Gene Body, Start)               | In intron of FADS1                                                                                            |
| rs174594   | C           | C           | 0.123898                | 0.546             | TF1 (transcription factor activity) | In intron of FADS2                                                                                            |
| rs97384    | T           | T           | 0.128068                | 2.21              | GM0 (Gene Body, Middle)             | In intron of FADS2                                                                                            |
| rs174455   | G           | G           | -0.128837               | 3.6               | GM1 (Gene Body, Middle)             | In enhancer / flanking active TSS region of FADS3 (TSS for adipose, muscle, osteoblast and ventricle tissues) |
| rs174465   | C           | C           | 1.908472                | 3.01              | GS (Gene Body, Start)               | In Promoter region of FADS3                                                                                   |



**Supplementary fig. 4.** Additional LocusZoom plots of GLGC data for High Density Lipoproteins, Total Cholesterol, and Triglycerides.

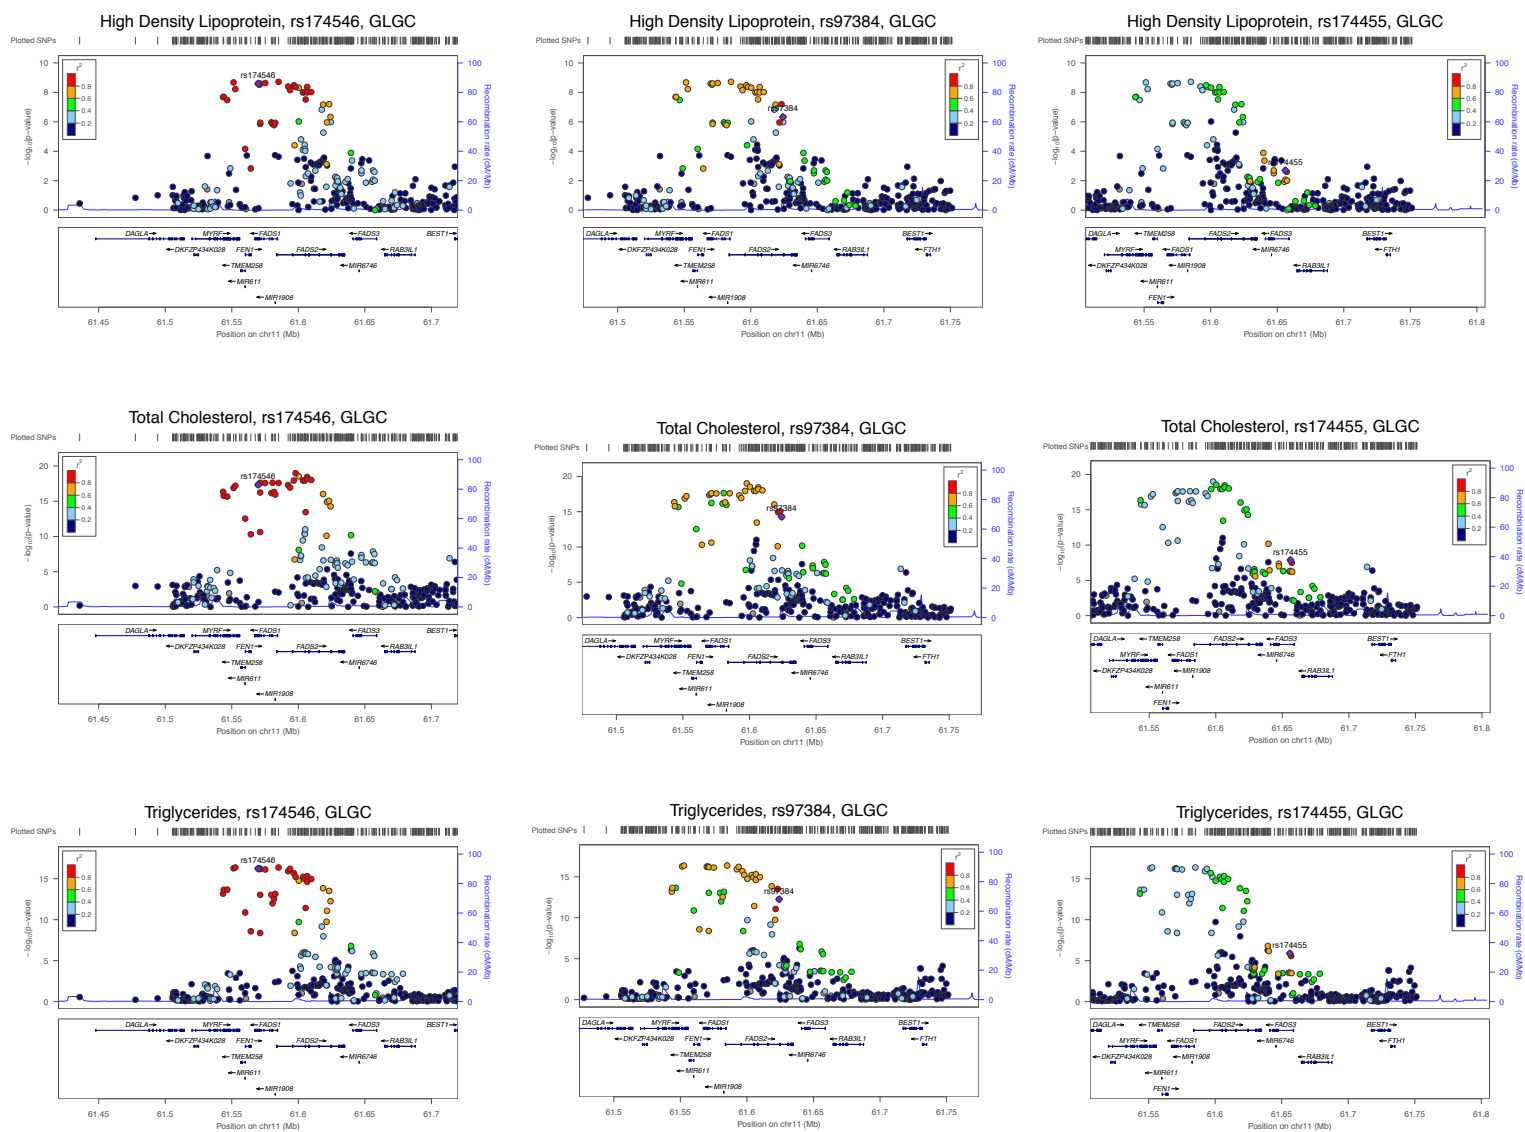

**Supplementary table 5A.** Extended Results – Top 100 Associations from AdditionPRO Metabolomics Phenotypes. 3 SNPs, 231 Different Phenotypes, 3 time points (30min, 120min, fasting) tested.

| SNP ID   | P-Value     | Effect Size | Phenotype Code      |
|----------|-------------|-------------|---------------------|
| rs174546 | 2.71E-13    | -0.924      | fasting LA/FA       |
| rs174546 | 2.98E-13    | -0.9114     | 30min LA/FA         |
| rs174594 | 9.16E-13    | -0.9418     | fasting LA/FA       |
| rs174546 | 2.7E-12     | 0.02137     | 120min UnSat        |
| rs174546 | 4.44E-12    | -0.8802     | 120min LA/FA        |
| rs174594 | 4.72E-12    | -0.902      | 30min LA/FA         |
| rs174594 | 2.43E-11    | -0.8874     | 120min LA/FA        |
| rs174594 | 8.77E-10    | 0.01948     | 120min UnSat        |
| rs174546 | 9.7E-10     | 0.01726     | fasting UnSat       |
| rs174546 | 9.85E-10    | 0.01749     | 30min UnSat         |
| rs174594 | 0.000000114 | 0.01574     | 30min UnSat         |
| rs174594 | 0.000000129 | 0.01543     | fasting UnSat       |
| rs174455 | 0.00000416  | -0.6264     | fasting LA/FA       |
| rs174594 | 0.00000456  | -0.1031     | 30min LA            |
| rs174594 | 0.0000161   | -0.09642    | fasting LA          |
| rs174594 | 0.0000199   | -0.09301    | 120min LA           |
| rs174546 | 0.0000246   | -0.09309    | 30min LA            |
| rs174546 | 0.000028    | -0.08965    | 120min LA           |
| rs174546 | 0.0000282   | 0.2872      | 30min SFA/FA        |
| rs174455 | 0.0000332   | -0.5705     | 120min LA/FA        |
| rs174594 | 0.0000372   | 0.2918      | 30min SFA/FA        |
| rs174455 | 0.0000419   | -0.5543     | 30min LA/FA         |
| rs174546 | 0.000053    | -0.08883    | fasting LA          |
| rs174594 | 0.0000974   | 0.276       | fasting SFA/FA      |
| rs174546 | 0.0001172   | 0.2642      | fasting SFA/FA      |
| rs174455 | 0.0001232   | 0.01292     | 120min UnSat        |
| rs174594 | 0.0001967   | 0.2667      | 120min SFA/FA       |
| rs174546 | 0.0002593   | 0.2518      | 120min SFA/FA       |
| rs174594 | 0.0004326   | 1.257       | 120min XL-HDL-PL_%  |
| rs174594 | 0.0006381   | 1.054       | fasting XL-HDL-PL_% |
| rs174594 | 0.0006383   | -1.031      | 120min XL-HDL-CE_%  |
| rs174594 | 0.0007008   | -1.019      | 120min XL-HDL-C_%   |

|          |           |          |                     |
|----------|-----------|----------|---------------------|
| rs174455 | 0.0008194 | 0.01039  | 30min UnSat         |
| rs174546 | 0.001074  | 0.9723   | fasting XL-HDL-PL_% |
| rs174546 | 0.001087  | 1.122    | 120min XL-HDL-PL_%  |
| rs174594 | 0.001586  | -0.8159  | fasting XL-HDL-C_%  |
| rs174546 | 0.001679  | 0.04112  | fasting HDL-C       |
| rs174594 | 0.001965  | -0.8049  | fasting XL-HDL-CE_% |
| rs174546 | 0.00215   | 5.81E-08 | fasting L-HDL-P     |
| rs174546 | 0.0022    | 0.03724  | fasting L-HDL-L     |
| rs174546 | 0.002234  | 0.01496  | fasting L-HDL-CE    |
| rs174546 | 0.002282  | 0.01975  | fasting L-HDL-C     |
| rs174546 | 0.002387  | 0.004811 | fasting L-HDL-FC    |
| rs174546 | 0.002398  | 0.01648  | fasting L-HDL-PL    |
| rs174546 | 0.002443  | -0.8787  | 120min XL-HDL-CE_%  |
| rs174546 | 0.00266   | 0.03962  | 120min HDL-C        |
| rs174546 | 0.002844  | -0.8629  | 120min XL-HDL-C_%   |
| rs174455 | 0.003284  | -0.07057 | 30min LA            |
| rs174594 | 0.00331   | -0.2309  | 30min L-HDL-PL_%    |
| rs174546 | 0.003578  | 0.04165  | fasting TotPG       |
| rs174546 | 0.003689  | 0.03428  | fasting HDL2-C      |
| rs174546 | 0.003751  | -0.7215  | fasting XL-HDL-C_%  |
| rs174546 | 0.003925  | -0.2557  | 120min XL-HDL-TG_%  |
| rs174455 | 0.004141  | 0.008717 | fasting UnSat       |
| rs174455 | 0.004533  | -0.06631 | 120min LA           |
| rs174594 | 0.004613  | 0.928    | 30min XL-HDL-PL_%   |
| rs174546 | 0.004664  | 0.02327  | fasting ApoA1       |
| rs174546 | 0.004685  | -0.7087  | fasting XL-HDL-CE_% |
| rs174546 | 0.004752  | -0.2471  | 30min XL-HDL-TG_%   |
| rs174546 | 0.004882  | 0.02601  | fasting HDL-D       |
| rs174546 | 0.005003  | 0.03347  | 120min HDL2-C       |
| rs174546 | 0.00526   | 0.005929 | fasting HDL3-C      |
| rs174546 | 0.005349  | -0.2492  | fasting XL-HDL-TG_% |
| rs174546 | 0.005391  | 0.001039 | fasting L-HDL-TG    |
| rs174594 | 0.005415  | 0.3881   | 30min L-HDL-C_%     |
| rs174546 | 0.005434  | 0.01399  | 120min L-HDL-CE     |
| rs174546 | 0.005483  | -0.2086  | 30min L-HDL-PL_%    |
| rs174546 | 0.005488  | 0.3695   | 30min L-HDL-C_%     |
| rs174546 | 0.005504  | 0.0185   | 120min L-HDL-C      |
| rs174546 | 0.005522  | 0.008083 | fasting M-HDL-PL    |
| rs174546 | 0.005691  | 0.002096 | fasting M-HDL-FC    |
| rs174546 | 0.005772  | 0.004516 | 120min L-HDL-FC     |
| rs174546 | 0.005782  | 0.03761  | fasting PC          |
| rs174546 | 0.005913  | 0.03439  | 120min L-HDL-L      |
| rs174546 | 0.006021  | 5.34E-08 | 120min L-HDL-P      |

|          |          |          |                     |
|----------|----------|----------|---------------------|
| rs174546 | 0.006098 | 0.01521  | 120min L-HDL-PL     |
| rs174594 | 0.006237 | -0.2466  | 30min XL-HDL-TG_%   |
| rs174455 | 0.006545 | -0.8344  | 120min XL-HDL-C_%   |
| rs174594 | 0.006903 | 0.2839   | 30min L-HDL-CE_%    |
| rs174455 | 0.007151 | 0.9929   | 120min XL-HDL-PL_%  |
| rs174546 | 0.00749  | -0.1436  | 120min VLDL-D       |
| rs174546 | 0.007627 | 0.2678   | 30min L-HDL-CE_%    |
| rs174546 | 0.008026 | 0.0118   | fasting XL-HDL-PL   |
| rs174546 | 0.008188 | 0.03861  | fasting TotCho      |
| rs174455 | 0.008203 | -0.814   | 120min XL-HDL-CE_%  |
| rs174546 | 0.00843  | -0.351   | 120min MUFA/FA      |
| rs174455 | 0.008509 | -0.0627  | fasting LA          |
| rs174455 | 0.009005 | 0.8415   | fasting XL-HDL-PL_% |
| rs174546 | 0.009173 | 0.01674  | fasting M-HDL-L     |
| rs174546 | 0.009422 | 3.85E-08 | fasting M-HDL-P     |
| rs174546 | 0.00944  | 0.09985  | 30min L-HDL-FC_%    |
| rs174546 | 0.009514 | 0.003933 | 120min S-HDL-C      |
| rs174546 | 0.009583 | 0.02636  | 120min HDL-D        |
| rs174594 | 0.009893 | -0.236   | 120min XL-HDL-TG_%  |
| rs174546 | 0.01005  | -0.02059 | 120min M-VLDL-TG    |
| rs174594 | 0.01028  | -0.2361  | fasting XL-HDL-TG_% |
| rs174546 | 0.01055  | 0.05052  | fasting M-HDL-FC_%  |
| rs174546 | 0.01062  | 0.01155  | 120min XL-HDL-PL    |
| rs174546 | 0.0107   | 0.02108  | 120min ApoA1        |
| rs174546 | 0.01079  | 0.007016 | 120min M-HDL-PL     |

**Supplementary table 5B.** Phenotype Full Descriptions and Phenotype Codes

| Phenotype Full Description                                       | Phenotype Code |
|------------------------------------------------------------------|----------------|
| Concentration of chylomicrons and extremely large VLDL particles | XXL-VLDL-P     |
| Total lipids in chylomicrons and extremely large VLDL            | XXL-VLDL-L     |
| Phospholipids in chylomicrons and extremely large VLDL           | XXL-VLDL-PL    |
| Total cholesterol in chylomicrons and extremely large VLDL       | XXL-VLDL-C     |
| Cholesterol esters in chylomicrons and extremely large VLDL      | XXL-VLDL-CE    |
| Free cholesterol in chylomicrons and extremely large VLDL        | XXL-VLDL-FC    |
| Triglycerides in chylomicrons and extremely large VLDL           | XXL-VLDL-TG    |
| Concentration of very large VLDL particles                       | XL-VLDL-P      |
| Total lipids in very large VLDL                                  | XL-VLDL-L      |
| Phospholipids in very large VLDL                                 | XL-VLDL-PL     |
| Total cholesterol in very large VLDL                             | XL-VLDL-C      |
| Cholesterol esters in very large VLDL                            | XL-VLDL-CE     |
| Free cholesterol in very large VLDL                              | XL-VLDL-FC     |
| Triglycerides in very large VLDL                                 | XL-VLDL-TG     |
| Concentration of large VLDL particles                            | L-VLDL-P       |
| Total lipids in large VLDL                                       | L-VLDL-L       |
| Phospholipids in large VLDL                                      | L-VLDL-PL      |
| Total cholesterol in large VLDL                                  | L-VLDL-C       |
| Cholesterol esters in large VLDL                                 | L-VLDL-CE      |
| Free cholesterol in large VLDL                                   | L-VLDL-FC      |
| Triglycerides in large VLDL                                      | L-VLDL-TG      |
| Concentration of medium VLDL particles                           | M-VLDL-P       |
| Total lipids in medium VLDL                                      | M-VLDL-L       |
| Phospholipids in medium VLDL                                     | M-VLDL-PL      |
| Total cholesterol in medium VLDL                                 | M-VLDL-C       |
| Cholesterol esters in medium VLDL                                | M-VLDL-CE      |
| Free cholesterol in medium VLDL                                  | M-VLDL-FC      |
| Triglycerides in medium VLDL                                     | M-VLDL-TG      |
| Concentration of small VLDL particles                            | S-VLDL-P       |
| Total lipids in small VLDL                                       | S-VLDL-L       |
| Phospholipids in small VLDL                                      | S-VLDL-PL      |
| Total cholesterol in small VLDL                                  | S-VLDL-C       |
| Cholesterol esters in small VLDL                                 | S-VLDL-CE      |
| Free cholesterol in small VLDL                                   | S-VLDL-FC      |

|                                            |            |
|--------------------------------------------|------------|
| Triglycerides in small VLDL                | S-VLDL-TG  |
| Concentration of very small VLDL particles | XS-VLDL-P  |
| Total lipids in very small VLDL            | XS-VLDL-L  |
| Phospholipids in very small VLDL           | XS-VLDL-PL |
| Total cholesterol in very small VLDL       | XS-VLDL-C  |
| Cholesterol esters in very small VLDL      | XS-VLDL-CE |
| Free cholesterol in very small VLDL        | XS-VLDL-FC |
| Triglycerides in very small VLDL           | XS-VLDL-TG |
| Concentration of IDL particles             | IDL-P      |
| Total lipids in IDL                        | IDL-L      |
| Phospholipids in IDL                       | IDL-PL     |
| Total cholesterol in IDL                   | IDL-C      |
| Cholesterol esters in IDL                  | IDL-CE     |
| Free cholesterol in IDL                    | IDL-FC     |
| Triglycerides in IDL                       | IDL-TG     |
| Concentration of large LDL particles       | L-LDL-P    |
| Total lipids in large LDL                  | L-LDL-L    |
| Phospholipids in large LDL                 | L-LDL-PL   |
| Total cholesterol in large LDL             | L-LDL-C    |
| Cholesterol esters in large LDL            | L-LDL-CE   |
| Free cholesterol in large LDL              | L-LDL-FC   |
| Triglycerides in large LDL                 | L-LDL-TG   |
| Concentration of medium LDL particles      | M-LDL-P    |
| Total lipids in medium LDL                 | M-LDL-L    |
| Phospholipids in medium LDL                | M-LDL-PL   |
| Total cholesterol in medium LDL            | M-LDL-C    |
| Cholesterol esters in medium LDL           | M-LDL-CE   |
| Free cholesterol in medium LDL             | M-LDL-FC   |
| Triglycerides in medium LDL                | M-LDL-TG   |
| Concentration of small LDL particles       | S-LDL-P    |
| Total lipids in small LDL                  | S-LDL-L    |
| Phospholipids in small LDL                 | S-LDL-PL   |
| Total cholesterol in small LDL             | S-LDL-C    |
| Cholesterol esters in small LDL            | S-LDL-CE   |
| Free cholesterol in small LDL              | S-LDL-FC   |
| Triglycerides in small LDL                 | S-LDL-TG   |
| Concentration of very large HDL particles  | XL-HDL-P   |
| Total lipids in very large HDL             | XL-HDL-L   |
| Phospholipids in very large HDL            | XL-HDL-PL  |
| Total cholesterol in very large HDL        | XL-HDL-C   |
| Cholesterol esters in very large HDL       | XL-HDL-CE  |
| Free cholesterol in very large HDL         | XL-HDL-FC  |
| Triglycerides in very large HDL            | XL-HDL-TG  |

|                                                                                   |               |
|-----------------------------------------------------------------------------------|---------------|
| Concentration of large HDL particles                                              | L-HDL-P       |
| Total lipids in large HDL                                                         | L-HDL-L       |
| Phospholipids in large HDL                                                        | L-HDL-PL      |
| Total cholesterol in large HDL                                                    | L-HDL-C       |
| Cholesterol esters in large HDL                                                   | L-HDL-CE      |
| Free cholesterol in large HDL                                                     | L-HDL-FC      |
| Triglycerides in large HDL                                                        | L-HDL-TG      |
| Concentration of medium HDL particles                                             | M-HDL-P       |
| Total lipids in medium HDL                                                        | M-HDL-L       |
| Phospholipids in medium HDL                                                       | M-HDL-PL      |
| Total cholesterol in medium HDL                                                   | M-HDL-C       |
| Cholesterol esters in medium HDL                                                  | M-HDL-CE      |
| Free cholesterol in medium HDL                                                    | M-HDL-FC      |
| Triglycerides in medium HDL                                                       | M-HDL-TG      |
| Concentration of small HDL particles                                              | S-HDL-P       |
| Total lipids in small HDL                                                         | S-HDL-L       |
| Phospholipids in small HDL                                                        | S-HDL-PL      |
| Total cholesterol in small HDL                                                    | S-HDL-C       |
| Cholesterol esters in small HDL                                                   | S-HDL-CE      |
| Free cholesterol in small HDL                                                     | S-HDL-FC      |
| Triglycerides in small HDL                                                        | S-HDL-TG      |
| Phospholipids to total lipids ratio in chylomicrons and extremely large VLDL      | XXL-VLDL-PL_% |
| Total cholesterol to total lipids ratio in chylomicrons and extremely large VLDL  | XXL-VLDL-C_%  |
| Cholesterol esters to total lipids ratio in chylomicrons and extremely large VLDL | XXL-VLDL-CE_% |
| Free cholesterol to total lipids ratio in chylomicrons and extremely large VLDL   | XXL-VLDL-FC_% |
| Triglycerides to total lipids ratio in chylomicrons and extremely large VLDL      | XXL-VLDL-TG_% |
| Phospholipids to total lipids ratio in very large VLDL                            | XL-VLDL-PL_%  |
| Total cholesterol to total lipids ratio in very large VLDL                        | XL-VLDL-C_%   |
| Cholesterol esters to total lipids ratio in very large VLDL                       | XL-VLDL-CE_%  |
| Free cholesterol to total lipids ratio in very large VLDL                         | XL-VLDL-FC_%  |
| Triglycerides to total lipids ratio in very large VLDL                            | XL-VLDL-TG_%  |
| Phospholipids to total lipids ratio in large VLDL                                 | L-VLDL-PL_%   |
| Total cholesterol to total lipids ratio in large VLDL                             | L-VLDL-C_%    |
| Cholesterol esters to total lipids ratio in large VLDL                            | L-VLDL-CE_%   |
| Free cholesterol to total lipids ratio in large VLDL                              | L-VLDL-FC_%   |
| Triglycerides to total lipids ratio in large VLDL                                 | L-VLDL-TG_%   |
| Phospholipids to total lipids ratio in medium VLDL                                | M-VLDL-PL_%   |
| Total cholesterol to total lipids ratio in medium VLDL                            | M-VLDL-C_%    |

|                                                             |              |
|-------------------------------------------------------------|--------------|
| Cholesterol esters to total lipids ratio in medium VLDL     | M-VLDL-CE_%  |
| Free cholesterol to total lipids ratio in medium VLDL       | M-VLDL-FC_%  |
| Triglycerides to total lipids ratio in medium VLDL          | M-VLDL-TG_%  |
| Phospholipids to total lipids ratio in small VLDL           | S-VLDL-PL_%  |
| Total cholesterol to total lipids ratio in small VLDL       | S-VLDL-C_%   |
| Cholesterol esters to total lipids ratio in small VLDL      | S-VLDL-CE_%  |
| Free cholesterol to total lipids ratio in small VLDL        | S-VLDL-FC_%  |
| Triglycerides to total lipids ratio in small VLDL           | S-VLDL-TG_%  |
| Phospholipids to total lipids ratio in very small VLDL      | XS-VLDL-PL_% |
| Total cholesterol to total lipids ratio in very small VLDL  | XS-VLDL-C_%  |
| Cholesterol esters to total lipids ratio in very small VLDL | XS-VLDL-CE_% |
| Free cholesterol to total lipids ratio in very small VLDL   | XS-VLDL-FC_% |
| Triglycerides to total lipids ratio in very small VLDL      | XS-VLDL-TG_% |
| Phospholipids to total lipids ratio in IDL                  | IDL-PL_%     |
| Total cholesterol to total lipids ratio in IDL              | IDL-C_%      |
| Cholesterol esters to total lipids ratio in IDL             | IDL-CE_%     |
| Free cholesterol to total lipids ratio in IDL               | IDL-FC_%     |
| Triglycerides to total lipids ratio in IDL                  | IDL-TG_%     |
| Phospholipids to total lipids ratio in large LDL            | L-LDL-PL_%   |
| Total cholesterol to total lipids ratio in large LDL        | L-LDL-C_%    |
| Cholesterol esters to total lipids ratio in large LDL       | L-LDL-CE_%   |
| Free cholesterol to total lipids ratio in large LDL         | L-LDL-FC_%   |
| Triglycerides to total lipids ratio in large LDL            | L-LDL-TG_%   |
| Phospholipids to total lipids ratio in medium LDL           | M-LDL-PL_%   |
| Total cholesterol to total lipids ratio in medium LDL       | M-LDL-C_%    |
| Cholesterol esters to total lipids ratio in medium LDL      | M-LDL-CE_%   |
| Free cholesterol to total lipids ratio in medium LDL        | M-LDL-FC_%   |
| Triglycerides to total lipids ratio in medium LDL           | M-LDL-TG_%   |
| Phospholipids to total lipids ratio in small LDL            | S-LDL-PL_%   |
| Total cholesterol to total lipids ratio in small LDL        | S-LDL-C_%    |
| Cholesterol esters to total lipids ratio in small LDL       | S-LDL-CE_%   |
| Free cholesterol to total lipids ratio in small LDL         | S-LDL-FC_%   |
| Triglycerides to total lipids ratio in small LDL            | S-LDL-TG_%   |
| Phospholipids to total lipids ratio in very large HDL       | XL-HDL-PL_%  |
| Total cholesterol to total lipids ratio in very large HDL   | XL-HDL-C_%   |
| Cholesterol esters to total lipids ratio in very large HDL  | XL-HDL-CE_%  |
| Free cholesterol to total lipids ratio in very large HDL    | XL-HDL-FC_%  |
| Triglycerides to total lipids ratio in very large HDL       | XL-HDL-TG_%  |
| Phospholipids to total lipids ratio in large HDL            | L-HDL-PL_%   |
| Total cholesterol to total lipids ratio in large HDL        | L-HDL-C_%    |
| Cholesterol esters to total lipids ratio in large HDL       | L-HDL-CE_%   |
| Free cholesterol to total lipids ratio in large HDL         | L-HDL-FC_%   |
| Triglycerides to total lipids ratio in large HDL            | L-HDL-TG_%   |



|                                                                            |            |
|----------------------------------------------------------------------------|------------|
| Phospholipids to total lipids ratio in medium HDL                          | M-HDL-PL_% |
| Total cholesterol to total lipids ratio in medium HDL                      | M-HDL-C_%  |
| Cholesterol esters to total lipids ratio in medium HDL                     | M-HDL-CE_% |
| Free cholesterol to total lipids ratio in medium HDL                       | M-HDL-FC_% |
| Triglycerides to total lipids ratio in medium HDL                          | M-HDL-TG_% |
| Phospholipids to total lipids ratio in small HDL                           | S-HDL-PL_% |
| Total cholesterol to total lipids ratio in small HDL                       | S-HDL-C_%  |
| Cholesterol esters to total lipids ratio in small HDL                      | S-HDL-CE_% |
| Free cholesterol to total lipids ratio in small HDL                        | S-HDL-FC_% |
| Triglycerides to total lipids ratio in small HDL                           | S-HDL-TG_% |
| Mean diameter for VLDL particles                                           | VLDL-D     |
| Mean diameter for LDL particles                                            | LDL-D      |
| Mean diameter for HDL particles                                            | HDL-D      |
| Serum total cholesterol                                                    | Serum-C    |
| Total cholesterol in VLDL                                                  | VLDL-C     |
| Remnant cholesterol (non-HDL, non-LDL -cholesterol)                        | Remnant-C  |
| Total cholesterol in LDL                                                   | LDL-C      |
| Total cholesterol in HDL                                                   | HDL-C      |
| Total cholesterol in HDL2                                                  | HDL2-C     |
| Total cholesterol in HDL3                                                  | HDL3-C     |
| Esterified cholesterol                                                     | EstC       |
| Free cholesterol                                                           | FreeC      |
| Serum total triglycerides                                                  | Serum-TG   |
| Triglycerides in VLDL                                                      | VLDL-TG    |
| Triglycerides in LDL                                                       | LDL-TG     |
| Triglycerides in HDL                                                       | HDL-TG     |
| Diacylglycerol                                                             | DAG        |
| Ratio of diacylglycerol to triglycerides                                   | DAG/TG     |
| Total phosphoglycerides                                                    | TotPG      |
| Ratio of triglycerides to phosphoglycerides                                | TG/PG      |
| Phosphatidylcholine and other cholines                                     | PC         |
| Sphingomyelins                                                             | SM         |
| Total cholines                                                             | TotCho     |
| Apolipoprotein A-I                                                         | ApoA1      |
| Apolipoprotein B                                                           | ApoB       |
| Ratio of apolipoprotein B to apolipoprotein A-I                            | ApoB/ApoA1 |
| Total fatty acids                                                          | TotFA      |
| Estimated description of fatty acid chain length, not actual carbon number | FALen      |
| Estimated degree of unsaturation                                           | UnSat      |
| 22:6, docosahexaenoic acid                                                 | DHA        |
| 18:2, linoleic acid                                                        | LA         |
| Conjugated linoleic acid                                                   | CLA        |
| Omega-3 fatty acids                                                        | FAw3       |

|                                                           |         |
|-----------------------------------------------------------|---------|
| Omega-6 fatty acids                                       | FAw6    |
| Polyunsaturated fatty acids                               | PUFA    |
| Monounsaturated fatty acids; 16:1, 18:1                   | MUFA    |
| Saturated fatty acids                                     | SFA     |
| Ratio of 22:6 docosahexaenoic acid to total fatty acids   | DHA/FA  |
| Ratio of 18:2 linoleic acid to total fatty acids          | LA/FA   |
| Ratio of conjugated linoleic acid to total fatty acids    | CLA/FA  |
| Ratio of omega-3 fatty acids to total fatty acids         | FAw3/FA |
| Ratio of omega-6 fatty acids to total fatty acids         | FAw6/FA |
| Ratio of polyunsaturated fatty acids to total fatty acids | PUFA/FA |
| Ratio of monounsaturated fatty acids to total fatty acids | MUFA/FA |
| Ratio of saturated fatty acids to total fatty acids       | SFA/FA  |
| Glucose                                                   | Glc     |
| Lactate                                                   | Lac     |
| Pyruvate                                                  | Pyr     |
| Citrate                                                   | Cit     |
| Alanine                                                   | Ala     |
| Glutamine                                                 | Gln     |
| Histidine                                                 | His     |
| Isoleucine                                                | Ile     |
| Leucine                                                   | Leu     |
| Valine                                                    | Val     |
| Phenylalanine                                             | Phe     |
| Tyrosine                                                  | Tyr     |
| Acetate                                                   | Ace     |
| Acetoacetate                                              | AcAce   |
| 3-hydroxybutyrate                                         | bOHBut  |
| Creatinine                                                | Crea    |
| Albumin                                                   | Alb     |

**Supplementary Table 6.** Association of rs174594 (derived allele) with cardiovascular biomarkers in the Nurses' and Health Professionals Follow-Up Study

| <b>Trait</b>                        | <b>Beta</b> | <b>SE</b> | <b>P value</b> |
|-------------------------------------|-------------|-----------|----------------|
| Plasma arachidonic acid (c20:4 n-6) | 1.18        | 0.06      | <0.0001        |
| Plasma EPA (c20:5 n-3)              | 0.096       | 0.014     | <0.0001        |
| Plasma total cholesterol (mg/dL)    | 3.495       | 1.28      | 0.006          |
| Plasma LDL cholesterol (mg/dL)      | 3.03        | 1.16      | 0.009          |
| Plasma HDL cholesterol (mg/dL)      | 0.60        | 0.48      | 0.21           |
| Plasma triglycerides (mg/dL)        | -2.86       | 2.76      | 0.30           |
| Plasma CRP (mg/dL)                  | -0.003      | 0.02      | 0.87           |

**Supplementary Table 7.** Sample IDs of Bronze Age data from Allentoft et al (2015).

| <b>54 Bronze Age European Samples</b> |         |           |          |           |            |
|---------------------------------------|---------|-----------|----------|-----------|------------|
| Sample ID                             | Country | Sample ID | Country  | Sample ID | Country    |
| RISE486                               | Italy   | RISE568   | CzechRep | RISE154   | Poland     |
| RISE487                               | Italy   | RISE569   | CzechRep | RISE577   | CzechRep   |
| RISE489                               | Italy   | RISE566   | CzechRep | RISE586   | CzechRep   |
| RISE349                               | Hungary | RISE567   | CzechRep | RISE71    | Denmark    |
| RISE479                               | Hungary | RISE446   | Germany  | RISE21    | Denmark    |
| RISE480                               | Hungary | RISE434   | Germany  | RISE61    | Denmark    |
| RISE483                               | Hungary | RISE435   | Germany  | RISE42    | Denmark    |
| RISE484                               | Hungary | RISE436   | Germany  | RISE47    | Denmark    |
| RISE247                               | Hungary | RISE471   | Germany  | RISE276   | Denmark    |
| RISE254                               | Hungary | RISE431   | Poland   | RISE175   | Sweden     |
| RISE371                               | Hungary | RISE1     | Poland   | RISE179   | Sweden     |
| RISE373                               | Hungary | RISE94    | Sweden   | RISE207   | Sweden     |
| RISE374                               | Hungary | RISE174   | Sweden   | RISE210   | Sweden     |
| RISE559                               | Germany | RISE00    | Estonia  | RISE97    | Sweden     |
| RISE560                               | Germany | RISE109   | Poland   | RISE98    | Sweden     |
| RISE562                               | Germany | RISE139   | Poland   | RISE598   | Lithuania  |
| RISE563                               | Germany | RISE145   | Poland   | RISE595   | Montenegro |
| RISE564                               | Germany | RISE150   | Poland   | RISE596   | Montenegro |

**Supplementary Figure 5.** Singleton Density Score (SDS) Distribution. A 100kb window including the *FADS* genes has an average FADS score of 0.266, which is greater than 97% of other 100kb windows tiled across the genome, providing evidence that *FADS* genes have been under recent selection. SDS scores (available from <http://pritchardlab.stanford.edu/software.html>) were calculated using UK10K Project data.

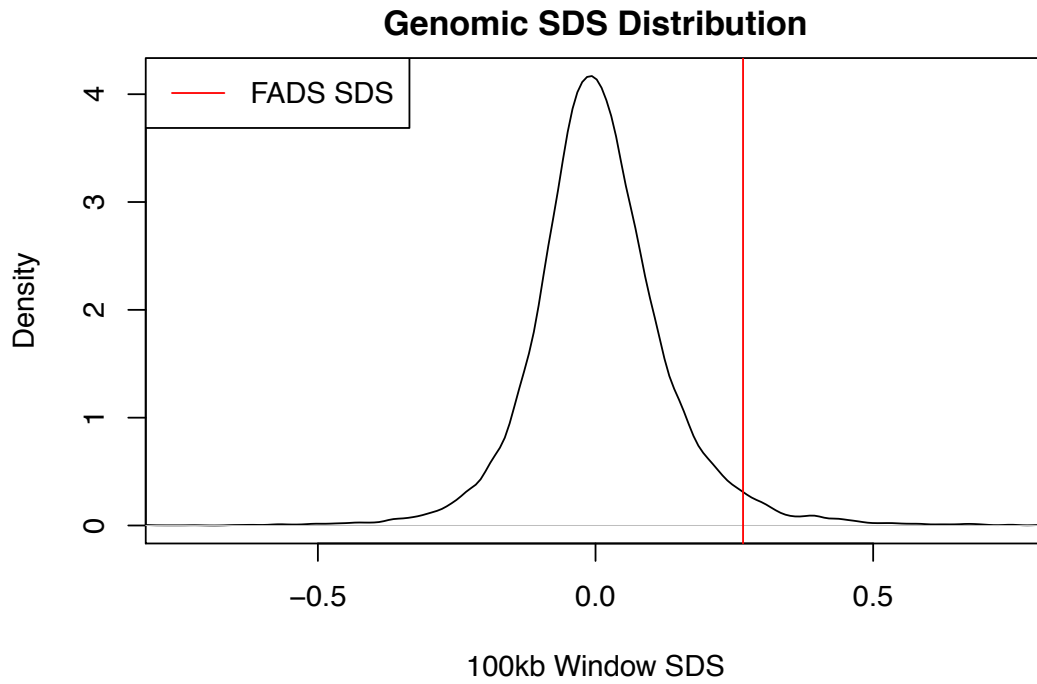

**Supplementary Figure 6.** No clear evidence of balancing selection found utilizing the composite likelihood ratio test method described by DeGiorgio et al (2014) on CEU data. FADS score denoted in red.

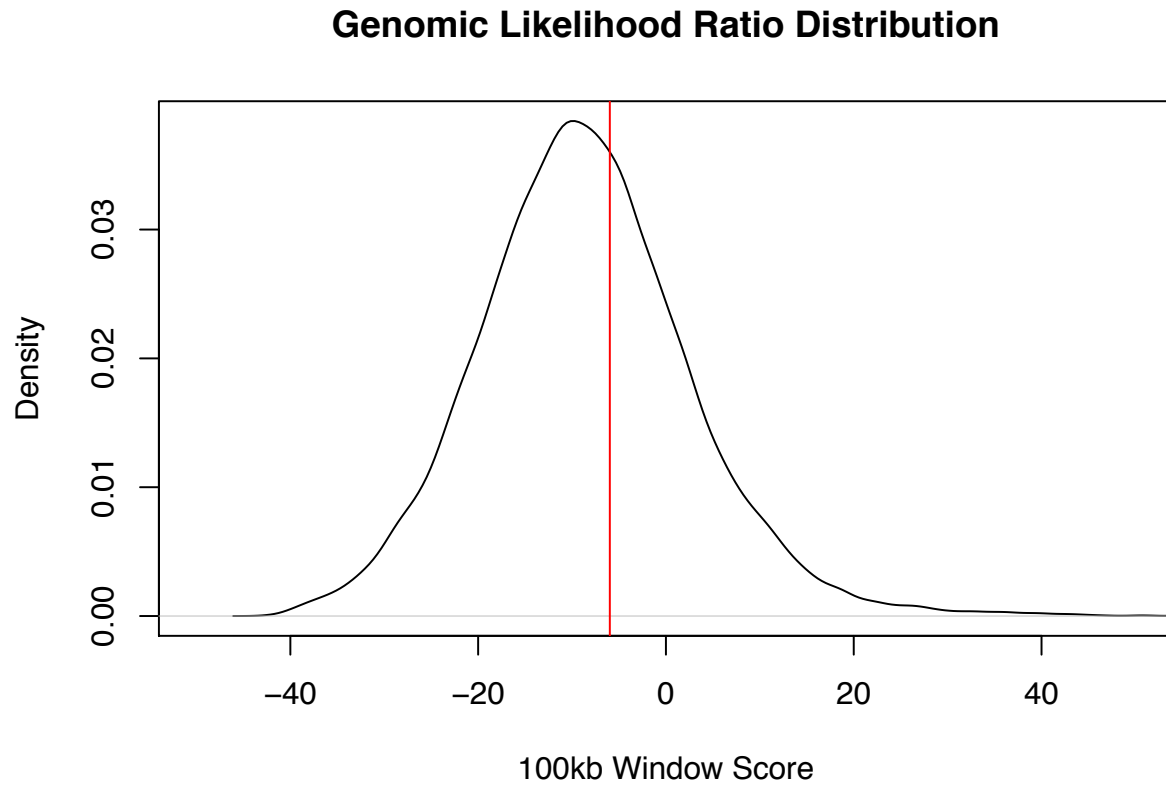

Supplement: msx103_Supp.pdf [file msx103_Supp.pdf]
